# Supplementary material
Source: publisher figshare collection journal article supplement (https://karger.figshare.com/ndownloader/files/21974328)
Supplement: Supplementary file 1 [file 21974328]

Table S3, A&B: Correlations for all patients with isolated severe AS and normal LVEF separated by gender

| Females | Valve Weight | | | |  | Valve Weight/BSA | | | |  | Valve Weight/AO Annulus Area | | | |
| --- | --- | --- | --- | --- | --- | --- | --- | --- | --- | --- | --- | --- | --- | --- |
| Echo Variable | Corr | LL | UL | p-value |  | Corr | LL | UL | p-value |  | Corr | LL | UL | p-value |
| Peak velocity (m/sec) | 0.12 | -0.01 | 0.24 | 0.081 |  | 0.12 | -0.01 | 0.24 | 0.080 |  | 0.05 | -0.09 | 0.18 | 0.49 |
| AV peak gradient (mmHg) | 0.15 | 0.02 | 0.28 | 0.025 |  | 0.15 | 0.02 | 0.28 | 0.023 |  | 0.08 | -0.06 | 0.21 | 0.25 |
| AV mean gradient (mmHg) | 0.18 | 0.05 | 0.30 | 0.007 |  | 0.18 | 0.05 | 0.31 | 0.006 |  | 0.09 | -0.05 | 0.22 | 0.21 |
| Dimensionless index (TVI) | -0.26 | -0.38 | -0.13 | <0.001 |  | -0.27 | -0.38 | -0.14 | <0.001 |  | -0.11 | -0.24 | 0.03 | 0.12 |
| AVA (cm2) | -0.15 | -0.28 | -0.02 | 0.020 |  | -0.16 | -0.28 | -0.03 | 0.019 |  | -0.18 | -0.31 | -0.05 | 0.007 |
| AVA index (cm2/m2) | -0.16 | -0.28 | -0.03 | 0.017 |  | -0.16 | -0.29 | -0.03 | 0.015 |  | -0.19 | -0.31 | -0.05 | 0.006 |
| Energy loss index (mmHg/ml/m2) | -0.22 | -0.35 | -0.07 | 0.004 |  | -0.22 | -0.35 | -0.07 | 0.004 |  | -0.14 | -0.29 | 0.01 | 0.059 |

| Male | Valve Weight | | | |  | Valve Weight/BSA | | | |  | | Valve Weight/AO Annulus Area | | | |
| --- | --- | --- | --- | --- | --- | --- | --- | --- | --- | --- | --- | --- | --- | --- | --- |
| Echo Variable | Corr | LL | UL | p-value |  | Corr | LL | UL | p-value | |  | Corr | LL | UL | p-value |
| Peak velocity (m/sec) | 0.16 | 0.05 | 0.26 | 0.005 |  | 0.17 | 0.06 | 0.27 | 0.003 | |  | 0.24 | 0.14 | 0.35 | <0.001 |
| AV peak gradient (mmHg) | 0.17 | 0.06 | 0.27 | 0.003 |  | 0.18 | 0.07 | 0.28 | 0.002 | |  | 0.26 | 0.15 | 0.36 | <0.001 |
| AV mean gradient (mmHg) | 0.18 | 0.07 | 0.29 | 0.001 |  | 0.19 | 0.08 | 0.29 | 0.002 | |  | 0.25 | 0.14 | 0.35 | <0.001 |
| Dimensionless index (TVI) | -0.25 | -0.35 | -0.15 | <0.001 |  | -0.26 | -0.36 | -0.15 | <0.001 | |  | -0.11 | -0.22 | 0.00 | 0.056 |
| AVA (cm2) | -0.19 | -0.30 | -0.08 | 0.002 |  | -0.20 | -0.30 | -0.09 | <0.001 | |  | -0.23 | -0.34 | -0.13 | <0.001 |
| AVA index (cm2/m2) | -0.19 | -0.29 | -0.08 | 0.002 |  | -0.20 | -0.30 | -0.09 | 0.002 | |  | -0.23 | -0.33 | -0.12 | <0.001 |
| Energy loss index (mmHg/ml/m2) | -0.20 | -0.32 | -0.08 | 0.002 |  | -0.20 | -0.32 | -0.08 | 0.001 | |  | -0.22 | -0.34 | -0.10 | <0.001 |
